# Supplementary material for: An Efficient Approach to Large-Scale Ab Initio Conformational Energy Profiles of Small Molecules
Source: MDPI journal article supplement (doi:10.3390/molecules27238567), 2022-12-05
Supplement: s1 [file s1]

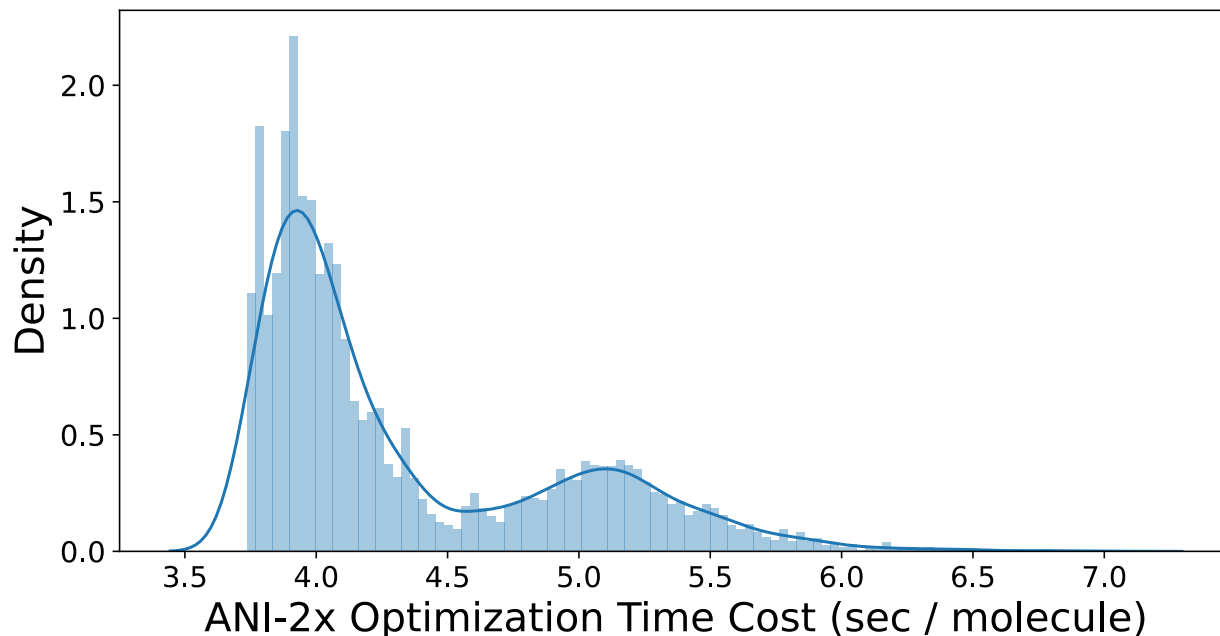

Figure S1. The distribution of the elapsed times of optimization with ANI-2x and ASE Python module. Since ANI-2x does not provide an official timer, the time was determined by the time elapsed from entering the command to the full exit of the program, which might overestimate the time cost.

Table S1. The SMILES of the fragments composing the dataset in this work. The scanned torsion bonds are indicated by the atoms with an atom map number.

| Index | SMILES                                         |
|-------|------------------------------------------------|
| 1     | <chem>O=[C:3](c1ccccc1)[c:2]1ccccc1</chem>     |
| 2     | <chem>O=[C:3](O)[c:2]1ccccc1O</chem>           |
| 3     | <chem>Nc1cccc[c:2]1[CH2:3]C(=O)O</chem>        |
| 4     | <chem>F[C:3](F)(F)[c:2]1ccccc1</chem>          |
| 5     | <chem>c1cc[c:2]([CH3:3])cc1</chem>             |
| 6     | <chem>O=Cc1cccc(O)[c:2]1[CH3:3]</chem>         |
| 7     | <chem>COc1cccc[c:5]1[OH:10]</chem>             |
| 8     | <chem>c1cc[c:2]([OH:3])cc1</chem>              |
| 9     | <chem>Cc1cc[c:2]([OH:8])cc1</chem>             |
| 10    | <chem>O=[S:2](=O)(Nc1cccn1)[c:1]1ccccc1</chem> |
| 11    | <chem>O=Cc1con[c:2]1-[c:3]1c(F)cccc1Cl</chem>  |
| 12    | <chem>O=Cc1cno[c:2]1[CH3:3]</chem>             |
| 13    | <chem>c1nn[c:2]([CH3:3])s1</chem>              |
| 14    | <chem>C/C=[C:2](/c1cccn1)[c:3]1ccccc1</chem>   |
| 15    | <chem>C/C=[C:2](\c1ccccc1)[c:5]1cccn1</chem>   |

|    |                                                       |
|----|-------------------------------------------------------|
| 16 | <chem>CC/C(C=O)=[C:2](\[C@](O)(C=O)CC)[OH:3]</chem>   |
| 17 | <chem>C=[CH:2][CH2:3]I</chem>                         |
| 18 | <chem>C=[CH:2][CH2:3]SS</chem>                        |
| 19 | <chem>CN/[C:2](=C(\C)C=O)[CH3:3]</chem>               |
| 20 | <chem>CC(C)(O)[C:2](=O)[CH2:3]Cl</chem>               |
| 21 | <chem>C[C:2](=O)[CH3:3]</chem>                        |
| 22 | <chem>C[C:7](=O)[N:9](C)C</chem>                      |
| 23 | <chem>C[C:1](=O)[NH2:3]</chem>                        |
| 24 | <chem>CC[C:1](=O)[NH2:3]</chem>                       |
| 25 | <chem>C[C@@H](c1ccccc1)[C:5](=O)[OH:16]</chem>        |
| 26 | <chem>C[C:2](=O)[O:4]SCF</chem>                       |
| 27 | <chem>C[C:2](=O)[S:4]C</chem>                         |
| 28 | <chem>C[C:2](=S)[O:4]C</chem>                         |
| 29 | <chem>C[N:4](C)[CH:2]=O</chem>                        |
| 30 | <chem>O=[CH:1][NH2:4]</chem>                          |
| 31 | <chem>O=[CH:1][SH:3]</chem>                           |
| 32 | <chem>S=[CH:1][SH:3]</chem>                           |
| 33 | <chem>CN[C:2](=O)[c:3]1c(-c2ccccc2)noc1C</chem>       |
| 34 | <chem>C[CH2:5][C:1](N)=O</chem>                       |
| 35 | <chem>N[C:1](=O)[CH3:5]</chem>                        |
| 36 | <chem>CN(C)[C:7](=O)[CH3:14]</chem>                   |
| 37 | <chem>CN[C:3](=O)[CH3:5]</chem>                       |
| 38 | <chem>CCN(CC)[C:3](=O)[N:6](C)C</chem>                |
| 39 | <chem>CN[C:1](=O)[N:2](C)N=O</chem>                   |
| 40 | <chem>O=c1cc[nH]c[c:5]1[C:3](=O)O</chem>              |
| 41 | <chem>CO[C:2](=O)[c:3]1cccn1</chem>                   |
| 42 | <chem>O=[C:3](O)[CH2:5]c1ccccc1</chem>                |
| 43 | <chem>C[C@@H:2](Br)[CH2:3]C</chem>                    |
| 44 | <chem>CC[C@H:2](Br)[CH3:4]</chem>                     |
| 45 | <chem>O=[CH:2][CH2:1]Br</chem>                        |
| 46 | <chem>Br[CH2:1][CH2:2]Br</chem>                       |
| 47 | <chem>Br[CH2:1][CH2:2]I</chem>                        |
| 48 | <chem>CC[C@@:2]1([CH3:3])[C@H](C)CC[C@]1(O)C=O</chem> |
| 49 | <chem>C=C[C@@:2](C(=C)C)(C(C)(C)Cl)[CH3:3]</chem>     |
| 50 | <chem>C[C:1](C)(C)[CH3:4]</chem>                      |
| 51 | <chem>CC(C)[C@@:2](C)(c1ccccc1)[OH:6]</chem>          |
| 52 | <chem>C=C(O)[C@:2](C(C)=O)(C(C)C)[OH:3]</chem>        |
| 53 | <chem>CC(=O)[C@@:2]1([OH:3])[C@H](C)CCC1(C)C</chem>   |
| 54 | <chem>C[C@H:2](C(=O)O)[c:3]1ccccc1</chem>             |

|    |                                                        |
|----|--------------------------------------------------------|
| 55 | <chem>C=C(C=O)[CH:2](C(=C)C=O)[c:3]1cccc2none21</chem> |
| 56 | <chem>O=C1C=CC(=O)[CH:2]1[c:3]1cccc1</chem>            |
| 57 | <chem>C[C@@H:2](c1cccc1)[C:5](=O)O</chem>              |
| 58 | <chem>O=C[C@]1(O)CCC[C@H:2]1[CH3:3]</chem>             |
| 59 | <chem>C[CH:1](C)[CH3:3]</chem>                         |
| 60 | <chem>C=C(O)[C@H:2](C(C)C)[N:3](C)C</chem>             |
| 61 | <chem>CC(C)[CH:2](C(C)C)[OH:3]</chem>                  |
| 62 | <chem>CC[C@@H:2](C(C)(C)Cl)[OH:3]</chem>               |
| 63 | <chem>O=C1NC(=O)[C:2](c2cccc2)([c:3]2cccc2)N1</chem>   |
| 64 | <chem>C[C:2](C)(NC=O)[CH3:3]</chem>                    |
| 65 | <chem>CO[C:2](C)(c1cccc1)[c:3]1cccc1</chem>            |
| 66 | <chem>CO[C:2](c1cccc1)(c1cccc1)[CH3:6]</chem>          |
| 67 | <chem>CC(C)[C@:2](O)(c1cccc1)[CH3:3]</chem>            |
| 68 | <chem>C[C:2](C)(O)[CH3:5]</chem>                       |
| 69 | <chem>C[C:2]1([CH3:3])SCN[C@H]1C=O</chem>              |
| 70 | <chem>c1cc[c:3]([CH2:2]c2cccn2)cc1</chem>              |
| 71 | <chem>CC[CH2:2][c:3]1cccc1</chem>                      |
| 72 | <chem>NC[CH2:2][c:3]1cccc1</chem>                      |
| 73 | <chem>C[CH2:1][c:2]1cccc1</chem>                       |
| 74 | <chem>c1ccc([CH2:2][c:3]2nccc3cccc32)cc1</chem>        |
| 75 | <chem>CC[C:4](=O)[CH2:3]C</chem>                       |
| 76 | <chem>C[CH2:2][CH:4]=O</chem>                          |
| 77 | <chem>C[CH2:3][C:5](=O)O</chem>                        |
| 78 | <chem>CC[CH2:3][CH2:2]C[NH3+]</chem>                   |
| 79 | <chem>CC[CH2:2][CH2:3]CC</chem>                        |
| 80 | <chem>C[C@@H](N)[CH2:2][CH2:3]c1cccc1</chem>           |
| 81 | <chem>C[CH2:1][CH2:2]C</chem>                          |
| 82 | <chem>C[CH2:3][CH2:2]CO</chem>                         |
| 83 | <chem>CC[CH2:1][CH2:3]C</chem>                         |
| 84 | <chem>C[CH2:2][CH2:3]Cl</chem>                         |
| 85 | <chem>NC[CH2:2][CH3:3]</chem>                          |
| 86 | <chem>C[C@@H](Br)[CH2:3][CH3:5]</chem>                 |
| 87 | <chem>CC[CH2:2][CH3:4]</chem>                          |
| 88 | <chem>OCC[CH2:3][CH3:5]</chem>                         |
| 89 | <chem>c1ccc([CH2:1][CH3:5])cc1</chem>                  |
| 90 | <chem>O=C[CH2:2][CH3:3]</chem>                         |
| 91 | <chem>CCC(=O)[CH2:3][CH3:6]</chem>                     |
| 92 | <chem>NC(=O)[CH2:5][CH3:6]</chem>                      |
| 93 | <chem>O=C(O)[CH2:3][CH3:4]</chem>                      |

|     |                                    |
|-----|------------------------------------|
| 94  | CCC[CH2:3][CH3:5]                  |
| 95  | C[CH2:1][CH3:2]                    |
| 96  | OC[CH2:2][CH3:4]                   |
| 97  | C[CH2:2][CH2:3]N                   |
| 98  | CC[CH2:2][CH2:4]O                  |
| 99  | C[CH2:2][CH2:3]O                   |
| 100 | NC[CH2:2][NH2:3]                   |
| 101 | BrC[CH2:1][NH2:4]                  |
| 102 | FC[CH2:1][NH2:4]                   |
| 103 | C[CH2:1][O:3]C                     |
| 104 | ClC[CH2:1][OH:4]                   |
| 105 | CP(=O)(O)[O:3][CH2:2]C             |
| 106 | CS(=O)(=O)[O:3][CH2:2]C            |
| 107 | N#C[S:3][CH2:2]CF                  |
| 108 | SC[CH2:1][SH:4]                    |
| 109 | BrC[CH2:1][SH:4]                   |
| 110 | C[CH2:2][SH:3]                     |
| 111 | O=C[CH2:1][SH:4]                   |
| 112 | ClC[CH2:1][SH:4]                   |
| 113 | C=C[CH2:3][S:4]S                   |
| 114 | CC1(C)SCN(C=O)[C@H:2]1[C:3](=O)O   |
| 115 | CN1CCC[C@@H:2]1[CH2:3]CO           |
| 116 | CN[C@H:2](C)[CH2:3]Cc1ccccc1       |
| 117 | CN[C@@H:2](C)[C@H:3](O)c1ccccc1    |
| 118 | CC[C@H:2](NC)[CH3:3]               |
| 119 | CN[C@H:2]([C@H](O)c1ccccc1)[CH3:5] |
| 120 | NC[C@@H:3](O)[c:6]1ccccc1          |
| 121 | C[CH:2](OC=O)[CH3:3]               |
| 122 | C[CH:2](O)[CH3:3]                  |
| 123 | CO[C@@H:2]([C@H](C)O)[CH2:3]O      |
| 124 | I[CH2:4][CH:2]1CS1                 |
| 125 | Cl[CH2:1][CH2:2]Br                 |
| 126 | Cl[CH2:1][CH2:2]Cl                 |
| 127 | Cl[CH2:1][CH2:2]I                  |
| 128 | O=[CH:2][CH2:1]F                   |
| 129 | F[CH2:1][CH2:2]Br                  |
| 130 | F[CH2:1][CH2:2]Cl                  |
| 131 | F[CH2:1][CH2:2]F                   |
| 132 | F[CH2:2][CH3:3]                    |

|     |                                         |
|-----|-----------------------------------------|
| 133 | F[CH2:1][CH2:2]I                        |
| 134 | N#CS[CH2:2][CH2:1]F                     |
| 135 | O=[S:3](=O)(OS)[CH2:1]F                 |
| 136 | Oc1cc[c:7]([CH3:1])cc1                  |
| 137 | O=[CH:3][CH3:2]                         |
| 138 | O=[C:4](O)[CH3:3]                       |
| 139 | O=[C:2](OSCF)[CH3:1]                    |
| 140 | CO[C:2](=S)[CH3:1]                      |
| 141 | CS[C:2](=O)[CH3:1]                      |
| 142 | O=C(O)[C@H:2](c1ccccc1)[CH3:1]          |
| 143 | ClC[CH2:2][CH3:1]                       |
| 144 | Cl[CH2:2][CH3:1]                        |
| 145 | [CH3:1][CH3:2]                          |
| 146 | I[CH2:2][CH3:1]                         |
| 147 | CP(=O)(O)O[CH2:2][CH3:1]                |
| 148 | CS(=O)(=O)O[CH2:2][CH3:1]               |
| 149 | S[CH2:2][CH3:1]                         |
| 150 | O=[N:2][CH3:1]                          |
| 151 | CN[NH:2][CH3:1]                         |
| 152 | N[NH:2][CH3:1]                          |
| 153 | SOS[NH:2][CH3:1]                        |
| 154 | POC[O:2][CH3:1]                         |
| 155 | NS(=O)(=O)[O:2][CH3:1]                  |
| 156 | COS[O:2][CH3:1]                         |
| 157 | CS(=O)[O:2][CH3:1]                      |
| 158 | CS(=O)(=O)[O:2][CH3:1]                  |
| 159 | SC[S:2][CH3:1]                          |
| 160 | C[S:2](=O)[CH3:1]                       |
| 161 | O[S:2][CH3:1]                           |
| 162 | O=[P+](O-)O[S:2][CH3:1]                 |
| 163 | CSO[S:2][CH3:1]                         |
| 164 | S[S:2][CH3:1]                           |
| 165 | O=[CH:2][CH2:1]I                        |
| 166 | I[CH2:1][CH2:2]I                        |
| 167 | CN(C)[CH2:2]/[CH:3]=C(c1ccccc1)c1ccccc1 |
| 168 | C=[CH:3][CH2:2]N(C)C                    |
| 169 | N[CH2:1][CH2:2]Br                       |
| 170 | C[CH2:3][CH2:2]NC=O                     |
| 171 | CC[CH2:3][CH2:2][N+](C)(C)C             |

|     |                                        |
|-----|----------------------------------------|
| 172 | CN(C)[CH2:2][CH2:3]c1ccccc1            |
| 173 | CN[CH2:2][CH2:3]c1ccccc1               |
| 174 | C[C@H](N)[C@H:3](O)[CH2:2]N(C)C        |
| 175 | CN[CH2:2][C@@H:3](O)c1ccccc1           |
| 176 | N[CH2:1][CH2:2]F                       |
| 177 | CN(C=O)[CH2:2][CH3:3]                  |
| 178 | N[CH2:2][CH3:3]                        |
| 179 | N[CH2:1][CH2:2]N                       |
| 180 | CN(C)[CH2:2][CH2:3]Oc1ccccc1           |
| 181 | O[CH2:1][CH2:2]Cl                      |
| 182 | CCO[CH2:3][CH3:5]                      |
| 183 | O[CH2:2][CH3:3]                        |
| 184 | CO[CH2:1][CH3:2]                       |
| 185 | CO[CH2:3][O:4]P                        |
| 186 | O[CH2:1][SH:3]                         |
| 187 | O=[CH:2][CH2:1]S                       |
| 188 | S[CH2:1][CH2:2]Br                      |
| 189 | S[CH2:1][CH2:2]Cl                      |
| 190 | S[CH2:1][CH2:2]S                       |
| 191 | S[CH2:1][OH:2]                         |
| 192 | CS[CH2:3][SH:4]                        |
| 193 | O=c1cc[n:2]([CH:3]2CC2)c2ccccc12       |
| 194 | c1ccc2c(c1)cc[n:2]2[CH3:3]             |
| 195 | Sc1enc[n:2]1[CH3:3]                    |
| 196 | CC[N:2](CC)[c:3]1cc2[nH]ccc(=O)c2cc1F  |
| 197 | CC[N:2](CC)[c:3]1ccccc1                |
| 198 | CC[N:2](CC)/[C:3](=N/c1ccccc1)c1ccccc1 |
| 199 | C[N:2](C)[CH:4]=S                      |
| 200 | CC[N:2](CC)[C:3](=O)N(C)C              |
| 201 | CC(C)[CH2:3][N:2](c1ccccc1)c1ccccc1    |
| 202 | CC(=O)[N:9](C)[CH3:10]                 |
| 203 | C[N:4](C=O)[CH3:9]                     |
| 204 | C[N:2](C=S)[CH3:3]                     |
| 205 | CNC(=O)[N:2](C)[N:3]=O                 |
| 206 | Cc1cccc[c:3]1[NH:2]c1ccccc1            |
| 207 | Clc1cccc(Cl)[c:3]1[NH:2]c1ccccc1       |
| 208 | CC(C)[NH:2][C:3](=O)c1ccccc1           |
| 209 | C[C@@H](C=O)[NH:2][C:3](=O)c1cnoc1     |
| 210 | C[NH:2][C:3](C)=O                      |

|     |                                             |
|-----|---------------------------------------------|
| 211 | C[NH:2][CH:4]=O                             |
| 212 | CC[NH:2][C:3](=O)N[SH](=O)=O                |
| 213 | C[C@H](O)[C@H](C(O)O)[NH:2][C:3](=O)N(C)N=O |
| 214 | CC(=O)[NH:2][C:3](C)(C)C                    |
| 215 | C[C@@H](O)[C@H:3](CS)[NH:2]C(=O)c1cccc1     |
| 216 | O=C(c1cnoc1)[NH:2][C@@H:3]1C(=O)N[C@@H]1S   |
| 217 | CC[CH2:3][NH:2]C(N)=O                       |
| 218 | CC(=O)[NH:2][CH3:4]                         |
| 219 | O=C[NH:2][CH3:3]                            |
| 220 | NC(=O)[N:2](N=O)[CH3:3]                     |
| 221 | c1cc[c:3]([NH2:2])cc1                       |
| 222 | O=CCc1cccc(C(=O)c2cccc2)[c:3]1[NH2:2]       |
| 223 | CS(=O)(=O)[NH:3][c:7]1cccc1                 |
| 224 | O=S(=O)(c1cccc1)[NH:3][c:7]1cccn1           |
| 225 | CN[C:3](=O)[NH:2]S(=O)(=O)c1cccc1           |
| 226 | c1ccc(/N=[N:2]/[c:3]2cccc2)cc1              |
| 227 | O=[N+:2]([O-])[c:3]1nc[nH]c1S               |
| 228 | C=C[CH2:3][N:2]1CCCC1                       |
| 229 | CC[N:2](C)[CH2:3]Cc1cccc1                   |
| 230 | CC[N:2](C)[CH2:3]CO                         |
| 231 | CC[N:2]([C@@H](C)C=O)[CH2:3][C@H](C)O       |
| 232 | C=C[CH2:3][N:2](CC)C(C)C                    |
| 233 | CC[N:2](CC)[CH3:3]                          |
| 234 | C[C@H]1CCC[N:2]1[CH3:3]                     |
| 235 | CC(C)[N:2](C)[CH3:3]                        |
| 236 | CC[N:2](C(C)C)[CH3:3]                       |
| 237 | C[N:1](C)[CH3:3]                            |
| 238 | CC[CH2:3][N+:2](C)(C)C                      |
| 239 | CC[N+:2](C)(C)[CH3:3]                       |
| 240 | CC[NH:2][C@H:3](C)CC                        |
| 241 | CC[NH:2][C@@H:3](C)[C@H](O)c1cccc1          |
| 242 | CC(C)[NH:2][CH2:3][C@@H](O)c1cccc1          |
| 243 | CC(C)[NH:2][CH2:3]Cc1cccc1                  |
| 244 | C[NH:1][CH3:2]                              |
| 245 | C[NH:2][NH:3]C                              |
| 246 | C[NH:2][NH2:3]                              |
| 247 | C[NH:2][S:3]OS                              |
| 248 | C[CH2:2][NH2:1]                             |
| 249 | CC[CH2:3][NH2:1]                            |

|     |                                                          |
|-----|----------------------------------------------------------|
| 250 | <chem>O=P(O)(O)O[S:2][NH2:1]</chem>                      |
| 251 | <chem>O=[S:2](O)[NH2:1]</chem>                           |
| 252 | <chem>C[O:2][c:3]1cc2cnccc2cc1O</chem>                   |
| 253 | <chem>C[O:2][c:3]1cc2cnccc2cc1O</chem>                   |
| 254 | <chem>C[O:2][c:3]1ccccc1O</chem>                         |
| 255 | <chem>CC[O:2][c:3]1ccccc1</chem>                         |
| 256 | <chem>C=C(C)[C:3](=O)[O:2]C(C)C</chem>                   |
| 257 | <chem>C=C(C)[C:3](=O)[O:2]C</chem>                       |
| 258 | <chem>CC[O:2][C:3](=O)c1ccncc1</chem>                    |
| 259 | <chem>CC(=O)[O:2][CH:3](C)C</chem>                       |
| 260 | <chem>CC(C)[CH2:3][O:2]C(=O)c1ccncc1</chem>              |
| 261 | <chem>c1ccc([O:2][CH3:3])cc1</chem>                      |
| 262 | <chem>CC(=O)[O:2][CH3:3]</chem>                          |
| 263 | <chem>CC(=S)[O:4][CH3:5]</chem>                          |
| 264 | <chem>CC(=O)[O:4][S:5]CF</chem>                          |
| 265 | <chem>O=Cc1cccc[c:3]1[OH:2]</chem>                       |
| 266 | <chem>Cc1cccc[c:3]1[OH:2]</chem>                         |
| 267 | <chem>O=c1cc[nH]cc1[C:3](=O)[OH:2]</chem>                |
| 268 | <chem>O=[C:3](c1ccccc1)[OH:2]</chem>                     |
| 269 | <chem>C[C@@H](N)[C:3](=O)[OH:2]</chem>                   |
| 270 | <chem>O=[C:3](Cc1ccccc1)[OH:2]</chem>                    |
| 271 | <chem>C[C:4](=O)[OH:1]</chem>                            |
| 272 | <chem>CC[C:5](=O)[OH:1]</chem>                           |
| 273 | <chem>O=[CH:3][OH:1]</chem>                              |
| 274 | <chem>CC[O:2][C:3](C)(c1ccccc1)c1ccccc1</chem>           |
| 275 | <chem>CC[C@:3]1([O:2]C)c2cccc3[nH]cc(c23)C[C@H]1N</chem> |
| 276 | <chem>CC[CH2:3][O:2]C(C)(c1ccccc1)c1ccccc1</chem>        |
| 277 | <chem>CC[O:1][CH2:3]C</chem>                             |
| 278 | <chem>CC(C)(C)[O:2][CH3:3]</chem>                        |
| 279 | <chem>CC[O:3][CH3:4]</chem>                              |
| 280 | <chem>C[O:1][CH3:2]</chem>                               |
| 281 | <chem>C[O:2][CH2:3]OP</chem>                             |
| 282 | <chem>CC[O:3][P:4](C)(=O)O</chem>                        |
| 283 | <chem>COC[O:4][PH2:5]</chem>                             |
| 284 | <chem>C[O:2][S:3](C)=O</chem>                            |
| 285 | <chem>C[O:2][S:3](C)(=O)=O</chem>                        |
| 286 | <chem>CC[O:3][S:4](C)(=O)=O</chem>                       |
| 287 | <chem>C[O:2][S:3](N)(=O)=O</chem>                        |
| 288 | <chem>CO[S:3][O:2]C</chem>                               |



|     |                                       |
|-----|---------------------------------------|
| 289 | C[C:2](C)(C)[OH:1]                    |
| 290 | C[C@H](N)[C@H:3]([C@@H](C)O)[OH:2]    |
| 291 | C[C@@H](O)[CH:3]([C@@H](C)O)[OH:2]    |
| 292 | NC[C@H:3](c1cccc1)[OH:2]              |
| 293 | C[CH:2](C)[OH:1]                      |
| 294 | C[C@H](O)[CH2:3][OH:2]                |
| 295 | CCC[CH2:4][OH:1]                      |
| 296 | C[CH2:2][OH:1]                        |
| 297 | CC[CH2:3][OH:1]                       |
| 298 | CO[C@@H:3]([C@@H](C)N)[OH:2]          |
| 299 | [OH:1][CH3:2]                         |
| 300 | O=[P:2][OH:1]                         |
| 301 | O=[S:2](=O)(OP)[OH:1]                 |
| 302 | COP(O)[O:5][CH3:6]                    |
| 303 | O=P[O:3][SH:4]                        |
| 304 | CS[O:3][P+:4](=O)[O-]                 |
| 305 | O=S(=O)(O)[O:5][PH2:6]                |
| 306 | NS[O:3][P:4](=O)(O)O                  |
| 307 | O=S(=O)(CF)[O:6][SH:7]                |
| 308 | CNS[O:4][SH:5]                        |
| 309 | O=[P:2][O:3]S                         |
| 310 | CCO[P:4](C)(=O)[OH:7]                 |
| 311 | CO[P:3](O)[O:5]C                      |
| 312 | CO[P:3](OC)[OH:4]                     |
| 313 | CCO[P:4](=O)(O)[CH3:6]                |
| 314 | NSO[P:4](=O)(O)[OH:6]                 |
| 315 | CC[S:2][c:3]1cccc1                    |
| 316 | Cn1cnc([NH+]=O)[c:3]1[S:2]c1ccn1      |
| 317 | c1nc2nc[nH]c2[c:3]([S:2]c2cnc[nH]2)n1 |
| 318 | C[C@@H](N)[CH2:3][S:2]c1cccc1         |
| 319 | C[S:1][CH3:2]                         |
| 320 | CC(=O)[S:4][CH3:5]                    |
| 321 | C[S:2][CH2:3]S                        |
| 322 | C[S:2][OH:3]                          |
| 323 | C[S:2][O:3][P+](=O)[O-]               |
| 324 | CS[O:3][S:2]C                         |
| 325 | C[S:2][S:3]C                          |
| 326 | C[S:2][SH:3]                          |
| 327 | C=CC[S:4][SH:5]                       |

|     |                                                 |
|-----|-------------------------------------------------|
| 328 | <chem>O=[S:2](=O)(c1cccc1)[NH:3]c1nncs1</chem>  |
| 329 | <chem>O=[S:2](=O)(c1cccc1)[NH:3]c1ccccc1</chem> |
| 330 | <chem>C[S:2](=O)(=O)[NH:3]c1cccc1</chem>        |
| 331 | <chem>O=[S:3](=O)(CF)[O:6]S</chem>              |
| 332 | <chem>[SH:1][CH3:2]</chem>                      |
| 333 | <chem>N[S:2][O:3]P(=O)(O)O</chem>               |
| 334 | <chem>CN[S:3][O:4]S</chem>                      |
| 335 | <chem>N[S:2](=O)[OH:4]</chem>                   |
| 336 | <chem>O=[S:2](=O)(Nc1nncs1)[c:6]1cccc1</chem>   |
| 337 | <chem>O=[S:2](=O)(Nc1cccc1)[CH3:6]</chem>       |
| 338 | <chem>CC(=O)O[S:5][CH2:6]F</chem>               |
| 339 | <chem>CO[S:3](=O)[CH3:5]</chem>                 |
| 340 | <chem>O=[S:2](O)[OH:4]</chem>                   |
| 341 | <chem>CO[S:3](=O)(=O)[CH3:6]</chem>             |
| 342 | <chem>CCO[S:4](=O)(=O)[CH3:7]</chem>            |
| 343 | <chem>CO[S:3](=O)(=O)[NH2:6]</chem>             |
| 344 | <chem>O=[S:2](=O)(O)[O:5]P</chem>               |
